# Supplementary material
Source: PubMed Central journal article supplement (PMC5148703)

**Supplementary Graph 1:**

Partial volume corrected hippocampal metabolism  
Covariates: Age, gender, education, hippocampal volume  
Vertical bars denote +/- standard errors

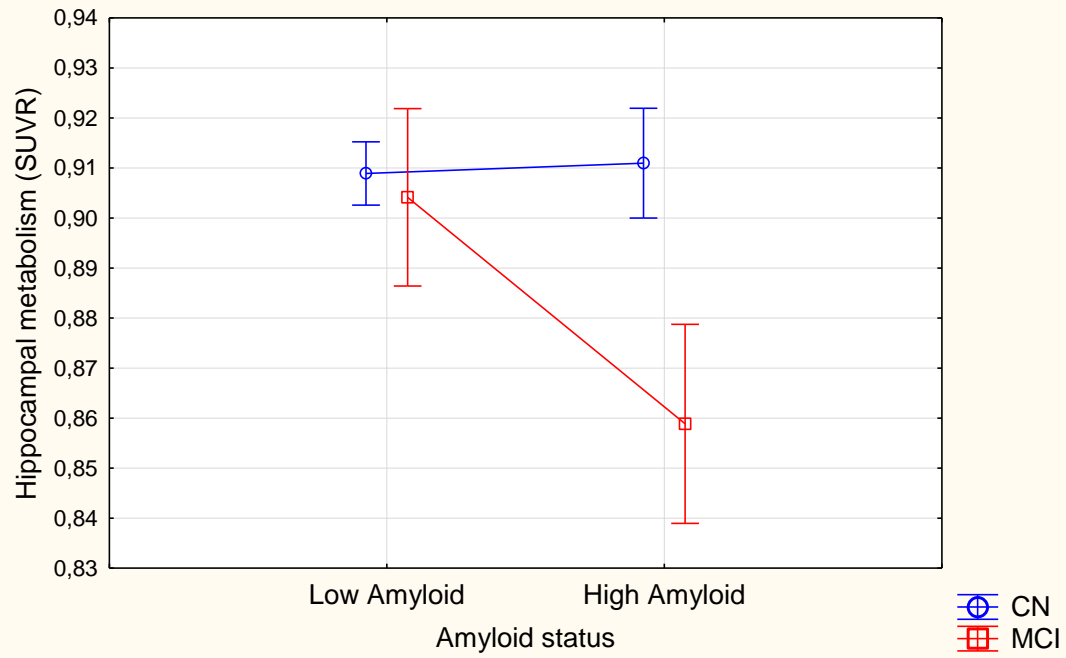

Supplement: NIHMS797936-supplement-1.pdf [file NIHMS797936-supplement-1.pdf]
