# Supplementary material
Source: PubMed Central journal article supplement (PMC5148703)

**Supplementary Graph 2:**

Partial volume corrected association cortex metabolism  
Covariates: age, gender, education, associative cortical thickness  
Vertical bars denote +/- standard errors

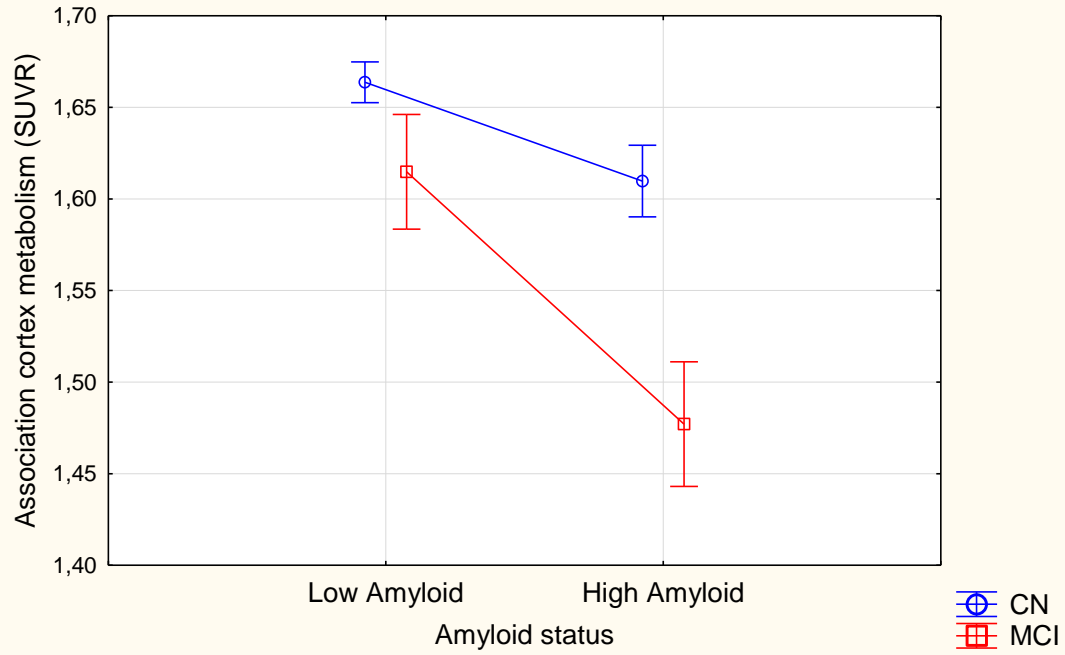

Supplement: NIHMS797936-supplement-2.pdf [file NIHMS797936-supplement-2.pdf]
