# Supplementary material
Source: PubMed Central journal article supplement (PMC5148703)

**Graph S3:**

Hippocampal metabolism (corrected for partial volume effects) against MMSE

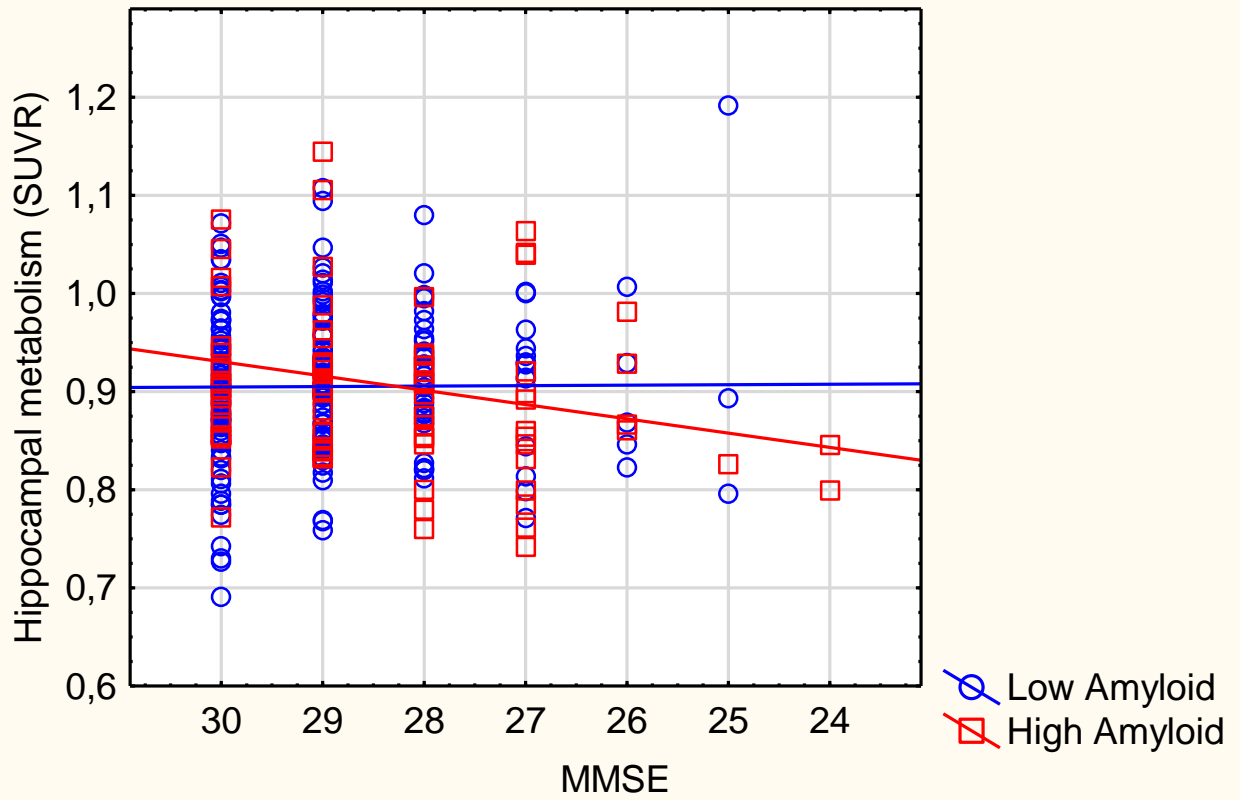

Supplement: NIHMS797936-supplement-3.pdf [file NIHMS797936-supplement-3.pdf]
